# Supplementary material for: Serum Lipid Levels and Suicidal Ideation of Adults: A Cross-Sectional Study Using the Korea National Health and Nutrition Examination Survey
Source: MDPI journal article supplement (doi:10.3390/jcm12134285), 2023-06-26

Supplementary Table S1. The risk of suicidal ideation according to the Household income and Education levels

|                  |                     | Men                            |               | Women           |  |                                |               |
|------------------|---------------------|--------------------------------|---------------|-----------------|--|--------------------------------|---------------|
|                  |                     | <i>n</i> =5,721                |               | <i>n</i> =8,051 |  |                                |               |
|                  |                     | PHQ9 (Suicidal ideation) – 9th |               | <i>p</i> -Value |  | PHQ9 (Suicidal ideation) – 9th |               |
|                  |                     | No                             | Yes           |                 |  | No                             | Yes           |
|                  |                     | <i>n</i> =5,453                | <i>n</i> =268 |                 |  | <i>n</i> =7,445                | <i>n</i> =606 |
| Household Income | 1 Quartile          | 840(87.9)                      | 113(12.1)     | <0.001          |  | 1312(84.2)                     | 253(15.8)     |
|                  | 2 Quartile          | 1334(95.9)                     | 59(4.1)       |                 |  | 1847(92.7)                     | 155(7.3)      |
|                  | 3 Quartile          | 1597(96.5)                     | 55(3.5)       |                 |  | 2082(94.4)                     | 126(5.6)      |
|                  | 4 Quartile          | 1682(97.4)                     | 41(2.6)       |                 |  | 2204(96.4)                     | 72(3.6)       |
| Education level  | ≤ Elementary school | 788(91.3)                      | 77(8.7)       | <0.001          |  | 1705(85.1)                     | 289(14.9)     |
|                  | Middle school       | 580(94.9)                      | 34(5.1)       |                 |  | 741(90.9)                      | 75(9.1)       |
|                  | High school         | 1882(95.2)                     | 90(4.8)       |                 |  | 2401(94.8)                     | 132(4.2)      |
|                  | ≥ University        | 2203(96.9)                     | 67(3.1)       |                 |  | 2598(92.9)                     | 110(7.1)      |

|                  |                    | Men                 |                 | Women               |                 |
|------------------|--------------------|---------------------|-----------------|---------------------|-----------------|
|                  |                    | OR (95% CI)         | <i>p</i> -Value | OR (95% CI)         | <i>p</i> -Value |
| Household Income | 1 <sup>st</sup>    | 5.082(3.283, 7.865) | <0.001          | 4.962(3.66, 6.726)  | <0.001          |
|                  | 2 <sup>nd</sup>    | 1.569(0.991, 2.484) | 0.055           | 2.087(1.509, 2.887) | <0.001          |
|                  | 3 <sup>rd</sup>    | 1.34(0.843, 2.129)  | 0.215           | 1.57(1.134, 2.174)  | 0.007           |
|                  | 4 <sup>th</sup>    | ref                 |                 | ref                 |                 |
| Education level  | ≤Elementary school | 3.007(2.023, 4.471) | <0.001          | 4.007(3.103, 5.175) | <0.001          |
|                  | Middle School      | 1.688(1.013, 2.811) | 0.044           | 2.286(1.607, 3.251) | <0.001          |
|                  | High School        | 1.604(1.1, 2.337)   | 0.014           | 1.34(1.01, 1.778)   | 0.042           |
|                  | ≥University        | ref                 |                 | ref                 |                 |

**Supplementary Table S2. Relationship between lipid levels and household income & education levels in Men**

| Variables         | Men<br><i>n</i> =5,721 |                 |                 |                 |                 |                        |               |                 |                 |                 |
|-------------------|------------------------|-----------------|-----------------|-----------------|-----------------|------------------------|---------------|-----------------|-----------------|-----------------|
|                   | Household Income       |                 |                 |                 |                 | Education Level        |               |                 |                 |                 |
|                   | 1 Quartile             | 2 Quartile      | 3 Quartile      | 4 Quartile      | <i>p</i> -Value | ≤<br>Elementary school | Middle School | High School     | ≥<br>University | <i>p</i> -Value |
|                   | <i>n</i> =953          | <i>n</i> =1,393 | <i>n</i> =1,652 | <i>n</i> =1,723 |                 | <i>n</i> =865          | <i>n</i> =614 | <i>n</i> =1,972 | <i>n</i> =2,270 |                 |
| LDL cholesterol   |                        |                 |                 |                 | <0.001          |                        |               |                 |                 | <0.001          |
| <100              | 392(41.39)             | 497(36.17)      | 555(32.64)      | 553(32.21)      |                 | 365(42.2)              | 250(38.63)    | 761(39.58)      | 621(27.6)       |                 |
| 100-129           | 328(34.24)             | 480(35.96)      | 565(33.86)      | 614(35.67)      |                 | 293(32.17)             | 212(34.68)    | 659(33.87)      | 823(36.61)      |                 |
| 130-159           | 164(17.05)             | 328(22.41)      | 395(24.18)      | 417(24)         |                 | 158(20.36)             | 125(20.97)    | 407(19.36)      | 614(26.62)      |                 |
| 160-189           | 56(6.21)               | 73(4.54)        | 121(8.23)       | 117(6.78)       |                 | 39(4.31)               | 22(4.48)      | 128(6.45)       | 178(7.67)       |                 |
| ≥190              | 13(1.11)               | 15(0.92)        | 16(1.1)         | 22(1.34)        |                 | 10(0.96)               | 5(1.24)       | 17(0.74)        | 34(1.51)        |                 |
| Total cholesterol |                        |                 |                 |                 | 0.001           |                        |               |                 |                 | <0.001          |
| <200              | 658(68.66)             | 880(64.74)      | 1007(59.61)     | 1051(60.47)     |                 | 613(69.47)             | 417(64.65)    | 1267(65.4)      | 1299(57.53)     |                 |
| 200-239           | 229(24.57)             | 410(28.61)      | 486(29.95)      | 517(30.32)      |                 | 205(24.82)             | 165(28.22)    | 532(26.2)       | 740(32.61)      |                 |
| ≥240              | 66(6.77)               | 103(6.65)       | 159(10.44)      | 155(9.21)       |                 | 47(5.7)                | 32(7.13)      | 173(8.4)        | 231(9.85)       |                 |
| HDL cholesterol   |                        |                 |                 |                 | 0.013           |                        |               |                 |                 | 0.014           |
| <40               | 287(28.78)             | 380(26.42)      | 415(23.83)      | 403(22.18)      |                 | 260(29.84)             | 183(28.09)    | 490(23.24)      | 552(23.81)      |                 |
| 40-59             | 559(61.24)             | 838(61.44)      | 1027(63.62)     | 1088(63.88)     |                 | 489(57.44)             | 349(57.14)    | 1227(64.25)     | 1447(63.94)     |                 |
| ≥60               | 107(9.98)              | 175(12.14)      | 210(12.55)      | 232(13.94)      |                 | 116(12.72)             | 82(14.78)     | 255(12.51)      | 271(12.25)      |                 |
| Triglyceride      |                        |                 |                 |                 | 0.767           |                        |               |                 |                 | 0.139           |
| <150              | 615(61.83)             | 835(60)         | 1010(60.58)     | 1019(59.64)     |                 | 550(60.85)             | 390(60.19)    | 1215(62.38)     | 1324(58.39)     |                 |
| 150-199           | 157(17.82)             | 229(16.66)      | 292(17.25)      | 293(16.47)      |                 | 144(17.88)             | 88(14.95)     | 325(15.9)       | 414(17.95)      |                 |
| ≥200              | 181(20.35)             | 329(23.34)      | 350(22.18)      | 411(23.89)      |                 | 171(21.27)             | 136(24.86)    | 432(21.72)      | 532(23.66)      |                 |

## Men - Household Income

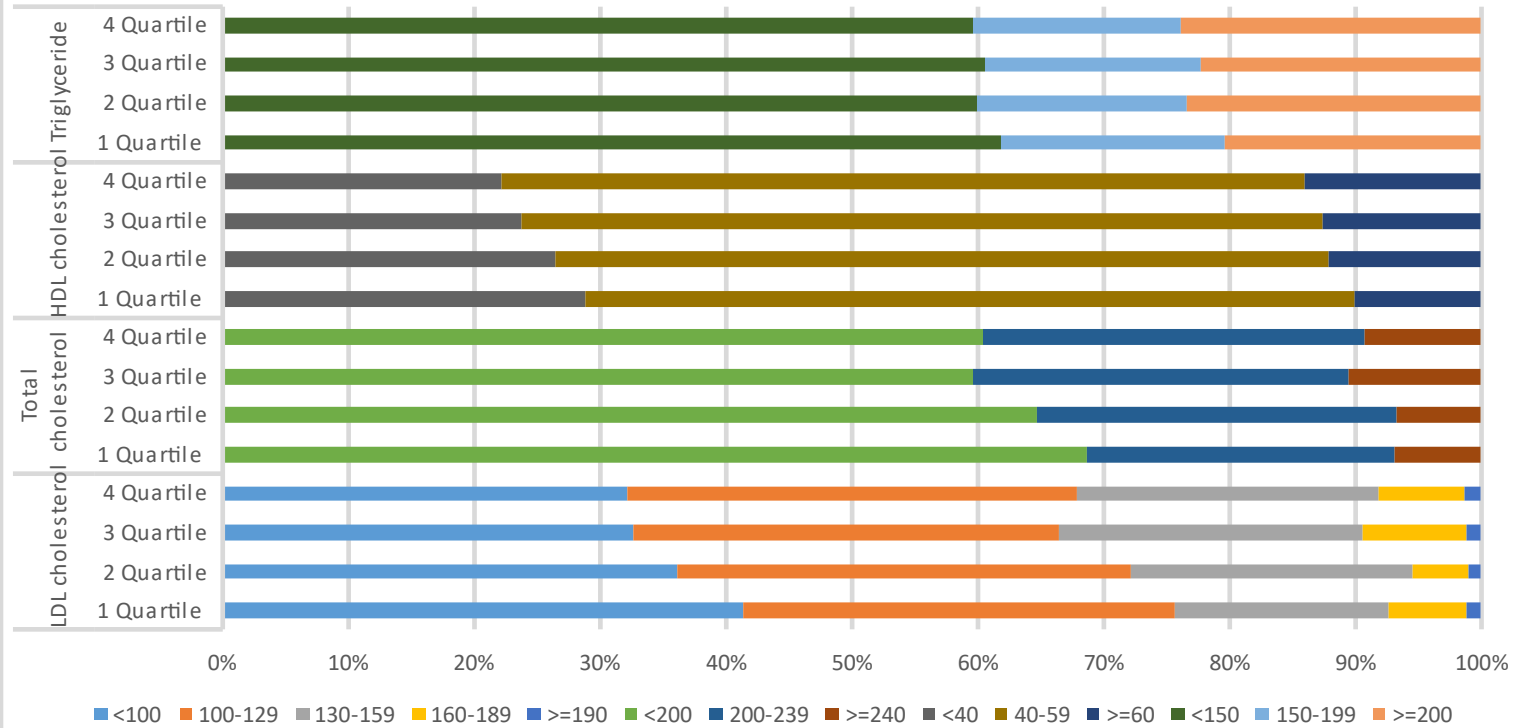

## Men - Education Level

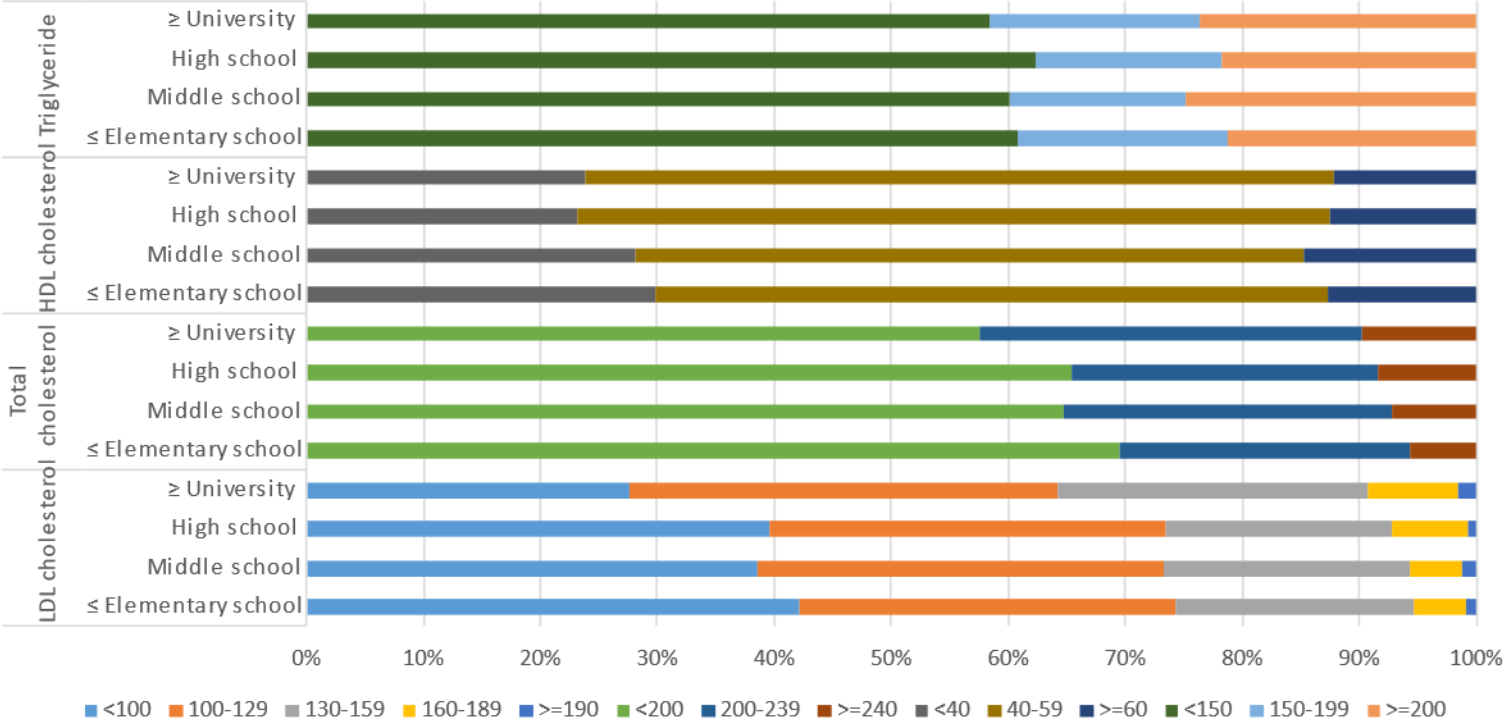

**Supplementary Table S3. Relationship between lipid levels and household income & education levels in Women**

| Variables         | Women<br><i>n</i> =8,051 |                 |                 |                 |                     |                           |                  |                 |                 |                     |
|-------------------|--------------------------|-----------------|-----------------|-----------------|---------------------|---------------------------|------------------|-----------------|-----------------|---------------------|
|                   | Household Income         |                 |                 |                 |                     | Education level           |                  |                 |                 |                     |
|                   | 1 Quartile               | 2 Quartile      | 3 Quartile      | 4 Quartile      | <i>p</i> -<br>Value | ≤<br>Elementary<br>school | Middle<br>School | High<br>School  | ≥<br>University | <i>p</i> -<br>Value |
|                   | <i>n</i> =1,565          | <i>n</i> =2,002 | <i>n</i> =2,208 | <i>n</i> =2,276 |                     | <i>n</i> =1,994           | <i>n</i> =816    | <i>n</i> =2,533 | <i>n</i> =2,708 |                     |
| LDL cholesterol   |                          |                 |                 |                 | 0.231               |                           |                  |                 |                 | <0.001              |
| <100              | 548(34.72)               | 671(35.27)      | 702(31.63)      | 744(33.59)      |                     | 679(32.63)                | 240(30.45)       | 833(34.12)      | 913(34.41)      |                     |
| 100-129           | 508(34.85)               | 731(36.71)      | 850(39.29)      | 890(39.82)      |                     | 638(32.86)                | 274(33.92)       | 944(37.93)      | 1123(41.94)     |                     |
| 130-159           | 345(20.68)               | 428(20.24)      | 461(20.46)      | 455(19.04)      |                     | 455(23.12)                | 200(23.82)       | 540(19.97)      | 494(17.55)      |                     |
| 160-189           | 135(7.96)                | 140(6.35)       | 161(6.91)       | 152(6.01)       |                     | 182(8.88)                 | 84(9.97)         | 174(6.34)       | 148(5.05)       |                     |
| ≥190              | 29(1.78)                 | 32(1.43)        | 34(1.71)        | 35(1.55)        |                     | 40(2.51)                  | 18(1.84)         | 42(1.64)        | 30(1.06)        |                     |
| Total cholesterol |                          |                 |                 |                 | 0.313               |                           |                  |                 |                 | <0.001              |
| <200              | 934(61.07)               | 1210(62.75)     | 1359(61.77)     | 1415(63.62)     |                     | 1178(57.64)               | 428(54.96)       | 1530(62.29)     | 1782(66.89)     |                     |
| 200-239           | 449(27.84)               | 607(28.91)      | 648(29.14)      | 644(27.25)      |                     | 582(30.02)                | 287(32.67)       | 765(28.81)      | 714(25.86)      |                     |
| ≥240              | 182(11.09)               | 185(8.34)       | 201(9.1)        | 217(9.13)       |                     | 234(12.34)                | 101(12.37)       | 238(8.9)        | 212(7.24)       |                     |
| HDL cholesterol   |                          |                 |                 |                 | <0.001              |                           |                  |                 |                 | <0.001              |
| <40               | 283(16.28)               | 226(10.2)       | 186(8.25)       | 182(7.18)       |                     | 375(18.19)                | 117(14.58)       | 231(8.91)       | 154(4.99)       |                     |
| 40-59             | 942(59.95)               | 1202(59.17)     | 1346(59.7)      | 1265(54.32)     |                     | 1265(62.84)               | 496(60.49)       | 1494(57.96)     | 1500(54.93)     |                     |
| ≥60               | 340(23.77)               | 574(30.63)      | 676(32.05)      | 829(38.5)       |                     | 354(18.98)                | 203(24.94)       | 808(33.14)      | 1054(40.08)     |                     |
| Triglyceride      |                          |                 |                 |                 | <0.001              |                           |                  |                 |                 | <0.001              |
| <150              | 1087(71.29)              | 1548(79.8)      | 1767(80.94)     | 1889(83.74)     |                     | 1332(66.81)               | 595(72.56)       | 2017(80.82)     | 2347(87.55)     |                     |
| 150-199           | 244(14.35)               | 230(9.8)        | 253(10.58)      | 202(8.68)       |                     | 344(16.91)                | 112(13.12)       | 268(9.86)       | 205(7.03)       |                     |
| ≥200              | 234(14.36)               | 224(10.4)       | 188(8.48)       | 185(7.58)       |                     | 318(16.27)                | 109(14.32)       | 248(9.32)       | 156(5.42)       |                     |

## Women - Household Income

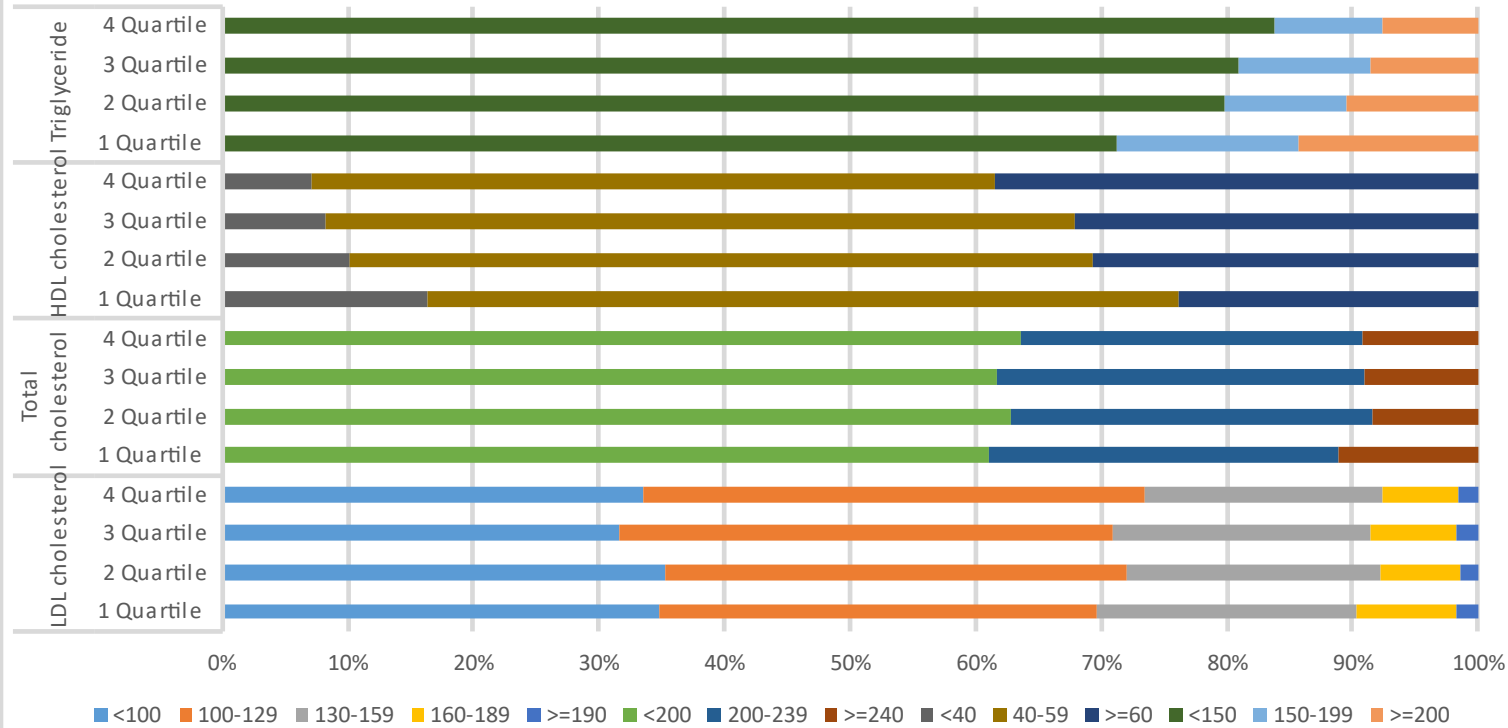

## Women - Education Level

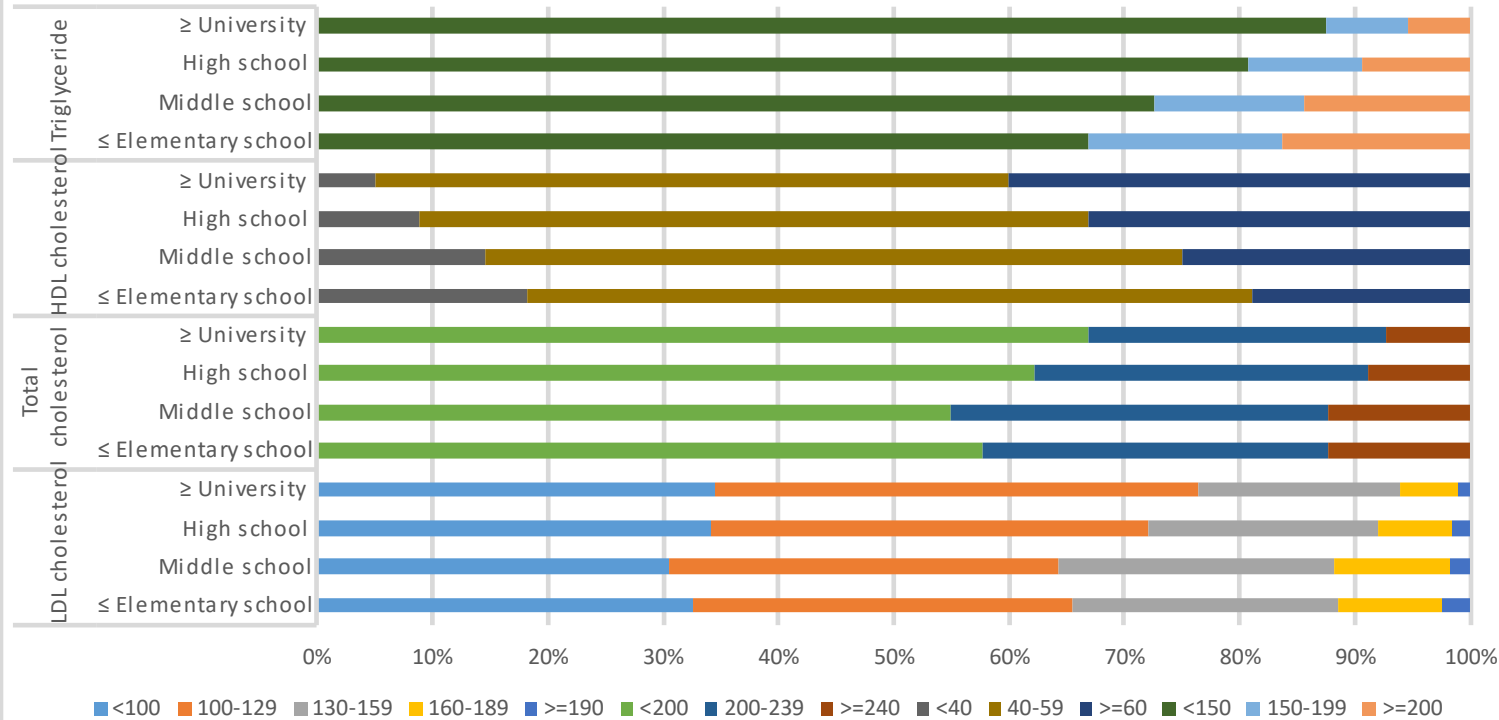

Supplement: s1 [file s1]
